# Supplementary material for: Active learning for regression of structure–property mapping: the importance of sampling and representation
Source: Royal Society of Chemistry journal article supplement (doi:10.1039/d4dd00073k), 2024-01-01
Supplement: d4dd00073k1.pdf [file d4dd00073k1.pdf]

# Supplementary Information to "Active learning for regression of structure-property mapping: the importance of sampling and representation"

Hao Liu<sup>1</sup>      Berkay Yucel<sup>2</sup>      Baskar Ganapathysubramanian<sup>3</sup>  
Surya R. Kalidindi<sup>2</sup>      Daniel Wheeler<sup>4</sup>      Olga Wodo<sup>1</sup>

<sup>1</sup>Materials Design and Innovation Department, University at Buffalo, Buffalo, NY, USA  
{olgawodo}@buffalo.edu

<sup>2</sup>The School of Materials Science and Engineering, the School of Computational Science and Engineering, Georgia Institute of Technology, GA, USA. <sup>3</sup>Mechanical Engineering Department, Iowa State University, IA, USA.

<sup>4</sup>Materials Science and Engineering Division, Material Measurement Laboratory, National Institute of Standards and Technology, Gaithersburg, MD, USA.

## 1 List of descriptors

Table 1 lists the descriptors used in this work.

## 2 Feature importance score

In this work, we calculate the feature importance score based on random forest (RF) algorithm [1, 2]. RF is constructed using a set of decision trees. Each decision tree has a set of internal nodes and leaves and uses these to calculate the feature importances based on how much the feature reduces the impurity (e.g. MSE) when it split a node. These importance scores are accumulated over all nodes. Finally, the feature importance scores are averaged across all tree models.

## 3 Quantitative analysis of sampling strategy—three metrics

In this work, we use three metrics to compare and contrast different sampling strategies:

- (i) Wasserstein distance, also known as earth mover distance, which is derived from optimal transport theory [3]. In this work, for each iteration, the Wasserstein distance metric is used to calculate the distance between the microstructure distribution,  $\mu$ , at each iteration and the complete microstructure distribution,  $\nu$ . Following work [4], the Wasserstein distance is defined as:

$$W_2(\mu, \nu) = \left( \min_{\Gamma \in \mathbb{R}_+^{m \times n}} \sum_{i,j} \Gamma_{i,j} \|\gamma_{x_i} - \gamma_{y_j}\|_2 \right)^{1/2} \quad (1)$$

s.t.  $\Gamma \mathbf{1} = \mu, \Gamma^T \mathbf{1} = \nu, \Gamma \geq 0$

where,  $\mu$  and  $\nu$  are two probability distributions,  $\Gamma$  is the optimal transport matrix and the  $L_2$  norm is the distance between samples (microstructures)  $\gamma_{x_i}$  and  $\gamma_{y_j}$  from two distributions.

- (ii) Entropy is used to measure the diversity of the data pool at each iteration. Formally, the Shannon entropy of a probability distribution,  $H$ , is defined as:

$$H = - \int p(\gamma) \log(p(\gamma)) d\gamma \quad (2)$$

where  $p(\gamma)$  is the probability density function of variable  $\gamma$ . Here, the kernel density estimator determines  $p$  of microstructure feature space,  $\gamma$ .

Table 1: The list of descriptors used in this work, the names of descriptors, and the corresponding GraSPI names. The abbreviations D, A, Ca, An, CC correspond to donor phase, acceptor phase, cathode, anode, and connected components, respectively. Note that the abbreviation D in this table is used for consistency with the software and should not mixed with the vector of descriptors from the main manuscript.

| $d_i$    | Descriptor                                                  | GraSPI name    |
|----------|-------------------------------------------------------------|----------------|
| $d_1$    | Fraction of D voxels                                        | ABS_f_D        |
| $d_2$    | Weighted fraction of D voxels in 10 distance to interface   | DISS_wf10_D    |
| $d_3$    | Interfacial area                                            | STAT_e         |
| $d_4$    | Number of D voxels                                          | STAT_n_D       |
| $d_5$    | Number of A voxels                                          | STAT_n_A       |
| $d_6$    | Number of D CCs                                             | STAT_CC_D      |
| $d_7$    | Number of A CCs                                             | STAT_CC_A      |
| $d_8$    | Number of D CCs connected to An                             | STAT_CC_D_An   |
| $d_9$    | Number of A CCs connected to Ca                             | STAT_CC_A_Ca   |
| $d_{10}$ | Weighted fraction of D                                      | ABS_wf_D       |
| $d_{11}$ | Fraction of D voxels in 10 distance to interface            | DISS_f10_D     |
| $d_{12}$ | Fraction of interface with complementary paths to An and Ca | CT_f.e.conn    |
| $d_{13}$ | Fraction of D voxels connected to An                        | CT_f.conn_D_An |
| $d_{14}$ | Fraction of A voxels connected to Ca                        | CT_f.conn_A_Ca |
| $d_{15}$ | Interfacial area with complementary paths                   | CT_e.conn      |
| $d_{16}$ | Number of D interfacial voxels with path to An              | CT_e_D_An      |
| $d_{17}$ | Number of A interfacial voxels with path to Ca              | CT_e_A_Ca      |
| $d_{18}$ | Fraction of D voxels with straight rising paths (t=1)       | CT_f_D_tort1   |
| $d_{19}$ | Fraction of A voxels with straight rising paths (t=1)       | CT_f_A_tort1   |
| $d_{20}$ | Number of D voxels in direct contact with An                | CT_n_D_adj_An  |
| $d_{21}$ | Number of A voxels in direct contact with Ca                | CT_n_A_adj_Ca  |

- (iii) Informativeness is measured by calculating the average variance of the unselected data pool at each iteration. The definition is shown in equation 4 of the main text.

## 4 Comparison of sampling for setting 2

Figure S1 depicts the distribution of query points for five sampling strategies. The features of query points for each sampling mimics the results presented in the main document. GSx and uncertainty sampling tend to choose query points from the boundary of the distribution in the latent space. GSy chooses query points to span the range of properties. Finally, iGS balances the sampling uniformity in input and output spaces.

## 5 Active learning combined with feature selection

The salient features selected based on currently labeled data will be changing along with the active learning process. However, salient features will be stable as sufficient data samples have been learned.

Table S2 and Figure S3 list salient features for the selected iterations of the AL workflow. Initially, 16 features are required to meet the 0.98 accumulated importance score criterion. With subsequent iterations, the number and the list of salient features converge. Table S2 provides the summary of the selected feature. Interestingly, the features used in setting 1 ( $d_3, d_{11}, d_{20}, d_{21}, d_2$ ) are consistently being selected beyond 10 iterations. The value of feature importance for these descriptors increases with iterations, as shown in Figure S3. For example,  $d_3$  scores high even in the early iterations. While the score of  $d_{20}$  gradually increases to become the third most important feature at iteration 490.

## References

- [1] Hao Liu, Berkay Yucel, Daniel Wheeler, Baskar Ganapathysubramanian, Surya R Kalidindi, and Olga Wodo. How important is microstructural feature selection for data-driven structure-property mapping? *MRS Communications*, pages 1–9, 2022.

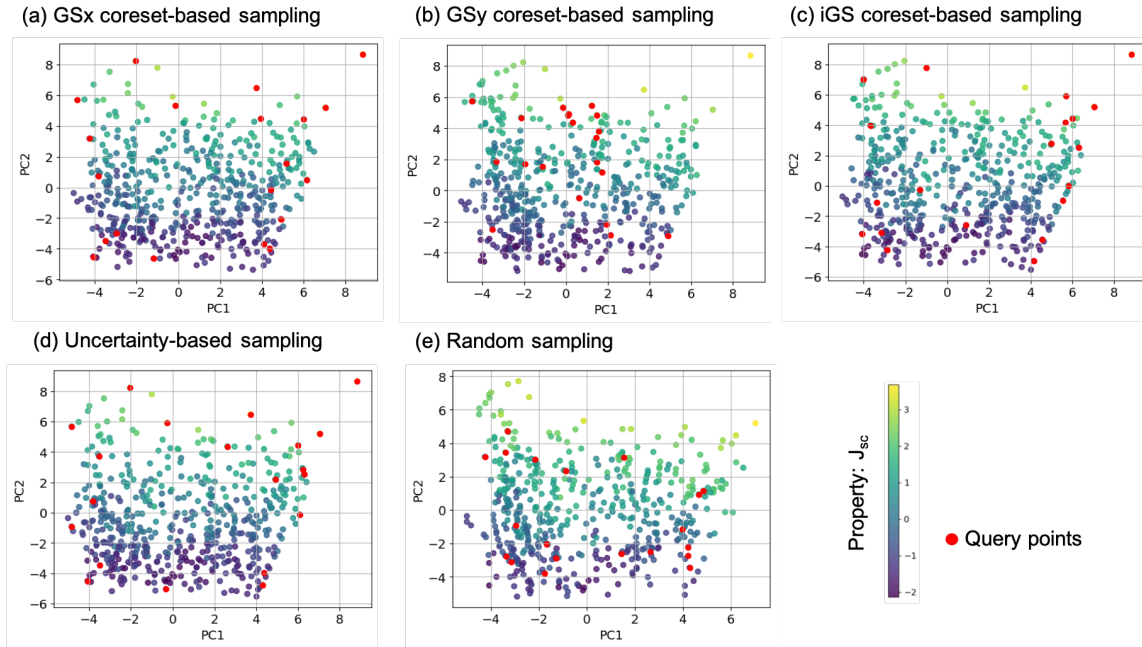

Figure S1: Visualization of query point selection using different sampling strategies: GSx, GSy, iGS, uncertainty sampling, and random sampling with unknown salient features. Each panel highlights 20 points selected using a given strategy (marked red), and also includes remaining points that are color-coded using the property of interest- $J_{sc}$ . Note that each point corresponds to one microstructure projected into the first two principal components of descriptor-based representation.

| Iterations | Number of features with accumulated importance > 0.98 | Selected features (ordered based on importance score)                    |
|------------|-------------------------------------------------------|--------------------------------------------------------------------------|
| 1          | 16                                                    | d19, d17, d3, d8, d11, d13, d12, d6, d2, d9, d20, d10, d14, d15, d16, d1 |
| 10         | 13                                                    | d3, d2, d11, d8, d17, d19, d15, d18, d21, d13, d12, d6, d9               |
| 100        | 11                                                    | d11, d3, d8, d2, d20, d16, d15, d21, d19, d18, d5                        |
| 490        | 9                                                     | d3, d11, d20, d21, d2, d8, d19, d18, d16                                 |

Figure S2: The selected features in the active learning process

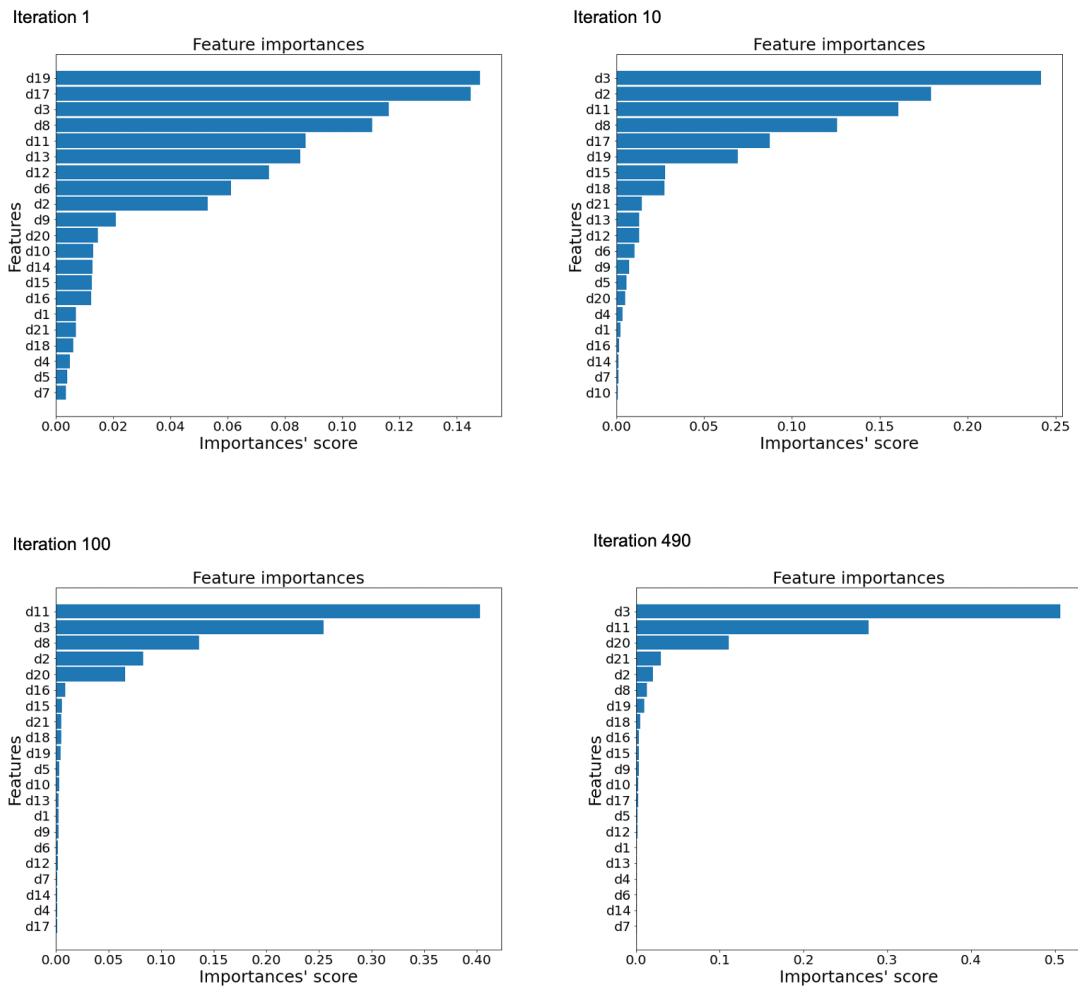

Figure S3: The feature selection results in the active learning process

- [2] Leo Breiman. Random forests. *Machine Learning*, 45(1):5–32, 2001.
- [3] Gabriel Peyré and Marco Cuturi. Computational optimal transport. *Found. Trends Mach. Learn.*, 11:355–607, 2018.
- [4] Rémi Flamary, Nicolas Courty, Alexandre Gramfort, Mokhtar Z. Alaya, Aurélie Boisbunon, Stanislas Chambon, Laetitia Chapel, Adrien Corenflos, Kilian Fatras, Nemo Fournier, Léo Gautheron, Nathalie T.H. Gayraud, Hicham Janati, Alain Rakotomamonjy, Ievgen Redko, Antoine Rolet, Antony Schutz, Vivien Seguy, Danica J. Sutherland, Romain Tavenard, Alexander Tong, and Titouan Vayer. Pot: Python optimal transport. *Journal of Machine Learning Research*, 22(78):1–8, 2021.
